# Supplementary material
Source: ML conference proceedings conference paper supplement (https://proceedings.neurips.cc/paper_files/paper/2013/hash/39e4973ba3321b80f37d9b55f63ed8b8-Abstract.html)
Supplement: Supplementary file [file 39e4973ba3321b80f37d9b55f63ed8b8-Supplemental.zip]

---

# Supplementary Material:

## Capacity of strong attractor patterns to model behavioural and cognitive prototypes

---

**Abbas Edalat**  
 Department of Computing  
 Imperial College London  
 London SW72RH, UK  
 ae@ic.ac.uk

We will present the proofs of Lemma 4.1, Lemma 4.3 and Theorem 4.2 here. For completeness, first recall Lyapunov's theorem in probability theory.

Let  $Y_n = \sum_{i=1}^{k_n} Y_{ni}$ , for  $n \in \mathbb{N}$ , be a *triangular array of random variables* such that for each  $n$ , the random variables  $Y_{ni}$ , for  $1 \leq i \leq k_n$  are independent with  $E(Y_{ni}) = 0$  and  $E(Y_{ni}^2) = \sigma_{ni}^2$ , where  $E(X)$  stands for the expected value of the random variable  $X$ . Let  $s_n^2 = \sum_{i=1}^{k_n} \sigma_{ni}^2$ . We use the notation  $X \sim Y$  when the two random variables  $X$  and  $Y$  have the same distribution (for large  $n$  if either or both of them depend on  $n$ ).

**Theorem** (Lyapunov) [2, page 368] *If for some  $\delta > 0$ , we have*

$$\frac{1}{s_n^{2+\delta}} E(|Y_n|^{2+\delta}) \rightarrow 0 \quad \text{as } n \rightarrow \infty$$

*then  $\frac{1}{s_n} Y_n \xrightarrow{d} \mathcal{N}(0, 1)$  as  $n \rightarrow \infty$  where  $\xrightarrow{d}$  denotes convergence in distribution, and we denote by  $\mathcal{N}(a, \sigma^2)$  the normal distribution with mean  $a$  and variance  $\sigma^2$ . Thus, for large  $n$  we have  $Y_n \sim \mathcal{N}(0, s_n^2)$ .  $\square$*

**Lemma 4.1** *Let  $X$  be a random variable on  $\mathbb{R}$  such that its probability distribution  $F(x) = \Pr(X \leq x)$  is differentiable with density  $F'(x) = f(x)$ . If  $g : \mathbb{R} \rightarrow \mathbb{R}$  is a bounded measurable function and  $X_k$  ( $k \geq 1$ ) is a sequence of independent and identically distributed random variables with distribution  $X$ , then*

$$\frac{1}{N} \sum_{i=1}^N g(X_i) \xrightarrow{\text{a.s.}} Eg(X) = \int_{-\infty}^{\infty} g(x) f(x) dx, \quad (1)$$

*and for all  $\epsilon > 0$  and  $t > 1$ , we have:*

$$\Pr \left( \sup_{k \geq N} \left( \frac{1}{k} \sum_{i=1}^k (g(X_i) - kE(g)(X)) \right) \geq \epsilon \right) = o(1/N^{t-1}) \quad (2)$$

**Proof** Since  $g$  is bounded,  $Eg(X) = \int_{-\infty}^{\infty} g(x) f(x) dx$  is absolutely convergent and thus the expected value  $Eg(X)$  is well-defined and  $|Eg(X)| < \infty$ . Equation (1) then follows from the Strong Law of Large Numbers [2, page 80] applied to the random variables  $g(X_i)$ , for  $i \geq 1$ , which are independent and identically distributed as  $g(X)$  with expectation  $Eg(X)$ . We also have  $E|g(X)|^t = \int_{-\infty}^{\infty} |g(x)|^t f(x) dx < \infty$  for all  $t > 1$  and thus the convergence rate of the Strong Law of Large Numbers implies Equation (2), a consequence of Theorem 3 and the lemma in [1, pages 112 and 113].  $\square$

Assume  $p/N = \alpha > 0$  with  $d_1 \ll p_0$  and  $d_\mu = 1$  for  $1 < \mu \leq p_0$ . Consider the overlaps

$$m_\nu = \frac{1}{N} \sum_{i=1}^N \xi_i^\nu \langle S_i \rangle \quad (3)$$

and the mean field equations:

$$m_\nu = \frac{1}{N} \sum_{i=1}^N \xi_i^\nu \tanh \left( \beta \sum_{\mu=1}^p d_\mu \xi_i^\mu m_\mu \right) \quad (4)$$

**Theorem 4.2** *There is a solution to the mean field equations (4) for retrieving  $\xi^1$  with independent random variables  $m_\nu$  (for  $1 \leq \nu \leq p_0$ ), where  $m_1 \sim \mathcal{N}(m, s/N)$  and  $m_\nu \sim \mathcal{N}(0, r/N)$  (for  $\nu \neq 1$ ), if the real numbers  $m$ ,  $s$  and  $r$  satisfy the four simultaneous equations:*

$$\begin{cases} \text{(i)} & m = \int_{-\infty}^{\infty} \frac{dz}{\sqrt{2\pi}} e^{-\frac{z^2}{2}} \tanh(\beta(d_1 m + \sqrt{\alpha r} z)) \\ \text{(ii)} & s = q - m^2 \\ \text{(iii)} & q = \int_{-\infty}^{\infty} \frac{dz}{\sqrt{2\pi}} e^{-\frac{z^2}{2}} \tanh^2(\beta(d_1 m + \sqrt{\alpha r} z)) \\ \text{(iv)} & r = \frac{q}{(1-\beta(1-q))^2} \end{cases} \quad (5)$$

In the proof of this theorem, as given below, we seek a solution of the mean field equations assuming we have independent random variables  $m_\nu$  (for  $1 \leq \nu \leq p_0$ ) such that for large  $N$  and  $p$  with  $p/N = \alpha$ , we have  $m_1 \sim \mathcal{N}(m, s/N)$  and  $m_\nu \sim \mathcal{N}(0, r/N)$  ( $\nu \neq 1$ ), and then find conditions in terms of  $m$ ,  $s$  and  $r$  to ensure that such a solution exists. Since by our assumption about the distribution of the overlaps  $m_\mu$ , the standard deviation of each overlap is  $O(1/\sqrt{N})$ , we ignore terms of  $O(1/N)$  and more generally terms of  $o(1/\sqrt{N})$  compared to terms of  $O(1/\sqrt{N})$  in the proof including in the lemma below.

**Lemma 4.3** If  $m_\nu \sim \mathcal{N}(0, r/N)$  (for  $\nu \neq 1$ ), then we have the equivalence of distributions:

$$\sum_{\mu \neq 1, \nu} \xi_i^1 \xi_i^\mu m_\mu \sim \mathcal{N}(0, \alpha r) \sim \sum_{\mu \neq 1} \xi_i^1 \xi_i^\mu m_\mu.$$

**Proof** Recall that the sum  $\sum_{t=1}^k X_t$  of  $k$  independent random variables such that  $X_t$  has a normal distribution with mean  $a_t$  and variance  $\sigma_t^2$  (for  $1 \leq t \leq k$ ) is itself normally distributed with mean  $\sum_{t=1}^k a_t$  and variance  $\sum_{t=1}^k \sigma_t^2$ . Consider the first equivalence. From  $-1 \leq \langle S_i \rangle \leq 1$ , for  $1 \leq i \leq N$ , and Equation (3), it follows that

$$\mathbb{E}(m_\mu \xi_j^\mu) = \mathbb{E} \left( \frac{1}{N} \sum_{i=1}^N \xi_i^\mu \langle S_i \rangle \xi_j^\mu \right) \leq \mathbb{E} \left( \frac{1}{N} \sum_{i=1}^N \xi_i^\mu \xi_j^\mu \right) = \frac{1}{N}$$

Similarly,  $\mathbb{E}(m_\mu \xi_j^\mu) \geq -1/N$ , and thus  $\mathbb{E}(m_\mu \xi_j^\mu) = O(1/N)$ . Therefore, for  $\mu \neq 1, \nu$ , the three random variables  $\xi_i^1$ ,  $\xi_i^\mu$  and  $m_\mu$  can be considered independent and it follows that the distribution of each product on the left hand side of the first equivalence is given by  $\mathcal{N}(0, r/N)$ . Summing up the approximately  $p$  independent normal distributions  $\mu \neq 1, \nu$ , we obtain the first equivalence. The second equivalence is proved in a similar way.  $\square$

**Proof of Theorem 4.2** First consider Equation (4) for  $\nu = 1$ , which, by separating the contributions of  $\mu = 1$  and  $\mu \neq 1$  on the right hand side, we write as

$$m_1 = Y_N := \frac{1}{N} \sum_{i=1}^N \xi_i^1 \tanh \beta(d_1 m_1 \xi_i^1 + \sum_{\mu \neq 1} \xi_i^\mu m_\mu). \quad (6)$$

Multiplying the odd function  $\tanh$  and its argument by  $\xi_i^1$ , we obtain:

$$\begin{cases} Y_N = \frac{1}{N} \sum_{i=1}^N \xi_i^1 \xi_i^1 \tanh \beta(d_1 m_1 \xi_i^1 \xi_i^1 + \sum_{\mu \neq 1} \xi_i^\mu \xi_i^1 m_\mu) \\ = \frac{1}{N} \sum_{i=1}^N \tanh \beta(d_1 m_1 + \sum_{\mu \neq 1} \xi_i^\mu \xi_i^1 m_\mu) \\ \xrightarrow{\text{a.s.}} \int_{-\infty}^{\infty} \frac{dz}{\sqrt{2\pi}} e^{-\frac{z^2}{2}} \tanh(\beta(m d_1 + \sqrt{\alpha r} z)), \end{cases} \quad (7)$$

where the last step is justified as follows. By Lemma 4.3

$$\sum_{\mu \neq 1} \xi_i^\mu \xi_i^1 m_\mu \sim \mathcal{N}(0, \alpha r) \quad (8)$$

Since, by assumption,  $m_1$  has distribution  $\mathcal{N}(m, s/N)$  and is independent of  $\sum_{\mu \neq 1} \xi_i^\mu \xi_i^1 m_\mu$ , it follows that  $d_1 m_1 + \sum_{\mu \neq 1} \xi_i^\mu \xi_i^1 m_\mu$  is the sum of two normal distributions and thus has itself normal distribution  $\mathcal{N}(d_1 m, \frac{d_1^2 s}{N} + r\alpha) \sim \mathcal{N}(d_1 m, r\alpha)$  by ignoring  $\frac{d_1^2 s}{N}$  compared to  $r\alpha$ :

$$X_i := d_1 m_1 + \sum_{\mu \neq 1} \xi_i^\mu \xi_i^1 m_\mu \sim \mathcal{N}(d_1 m, r\alpha) \quad (9)$$

Therefore, the random variables  $X_i$ , for  $i \geq 1$ , are independent and identically distributed with distribution  $\sim \mathcal{N}(d_1 m, \alpha r)$ , and the last step in Equation (7) then follows by applying Lemma 4.1 using  $g(x) = \tanh(\beta x)$ , which is a bounded continuous function. Since almost sure convergence implies convergence in distribution, it follows that as  $N \rightarrow \infty$ ,

$$Y_N \xrightarrow{\mathbf{d}} \int_{-\infty}^{\infty} \frac{dz}{\sqrt{2\pi}} e^{-\frac{z^2}{2}} \tanh(\beta(d_1 m + \sqrt{\alpha r} z)), \quad (10)$$

where the latter is the degenerate (point) distribution with the integral on the right hand side as its value. On the other hand, by the assumption about  $m_1$ , we have

$$m_1 \sim \mathcal{N}(m, s/N) \xrightarrow{\mathbf{d}} m, \quad (11)$$

as  $N \rightarrow \infty$ . Therefore, from Equations (6), (11) and (10), we can now obtain

$$m = \int_{-\infty}^{\infty} \frac{dz}{\sqrt{2\pi}} e^{-\frac{z^2}{2}} \tanh(\beta(d_1 m + \sqrt{\alpha r} z)), \quad (12)$$

which gives Equation (5(i)).

Next, write  $Y_N = \sum_{i=1}^N Y_{Ni}$  with  $Y_{Ni} = \frac{1}{N} \tanh \beta(X_i)$ . We have a triangular array of random variables with  $\mathbb{E}(Y_{Ni}) = m/N$ , by Equation (9), the equality in Equation (1), using  $g(x) = \frac{1}{N} \tanh \beta(x)$  and  $f$  as the Gaussian distribution  $\mathcal{N}(d_1 m, r\alpha)$ , and Equation (12). Furthermore,

$$\mathbb{E}(Y_{Ni}^2) = q/N^2, \quad (13)$$

by Equation (9), where  $q$  is given in Equation (5(iii)). This gives

$$\sigma_{Ni}^2 := \mathbb{E}(Y_{Ni}^2) - (\mathbb{E}(Y_{Ni}))^2 = (q - m^2)/N^2, \quad \sigma_N^2 := \sum_{i=1}^N \sigma_{Ni}^2 = (q - m^2)/N.$$

Moreover, it is easy to see that  $\mathbb{E}(|Y_{Ni}|^3) \leq 1/N^3$  since  $\tanh$  is bounded by 1. Thus,

$$\frac{1}{\sigma_N^3} \sum_{i=1}^N \mathbb{E}(|Y_{Ni}|^3) = O(1/N^{1/2}) \quad (14)$$

and it follows that the Lyapunov condition holds for  $\delta = 1$ . Therefore, by Lyapunov's theorem  $(Y_N - m)/\sigma_N \sim \mathcal{N}(0, 1)$ , as  $N \rightarrow \infty$ , and thus  $m_1 = Y_N \sim \mathcal{N}(m, (q - m^2)/N)$ , as  $N \rightarrow \infty$ . Since by assumption  $m_1 \sim \mathcal{N}(m, s/N)$ , we obtain the value of  $s = q - m^2$  as in Equation (5(ii)).

Now fix  $\nu \neq 1$  in Equation (4), take a sample point  $\omega \in \Omega$ , separate the three terms for  $\mu = 1$ ,  $\mu = \nu$  and  $\mu \neq 1, \nu$  on the right hand side of the equation, as before multiply  $\tanh$  and its argument by  $\xi_i^1$  and write the equation as  $m_\nu(\omega) = h(m_\nu(\omega))$ , where  $h : \mathbb{R} \rightarrow \mathbb{R}$  with

$$h(x) = \frac{1}{N} \sum_{i=1}^N \xi_i^\nu(\omega) \xi_i^1(\omega) \tanh \beta \left( d_1 m_1(\omega) + \xi_i^\nu(\omega) \xi_i^1(\omega) x + \sum_{\mu \neq 1, \nu} \xi_i^\mu(\omega) \xi_i^1(\omega) m_\mu(\omega) \right) \quad (15)$$

By assumption  $m_\nu$  is normally distributed with mean zero and standard deviation  $\sqrt{r}/\sqrt{N}$ . Therefore, in contrast to the case for  $m_1$  treated earlier, here  $m_\nu(\omega)$  is small and of order  $O(1/\sqrt{N})$ . Since  $m_\nu$  appears in two terms on both sides of  $m_\nu(\omega) = h(m_\nu(\omega))$ , we need to collect together on one side of the equation the contributions of these two terms. To this end, we regard  $m_\nu(\omega)$  as small compared with the term  $m_1(\omega)d_1$  and the term  $\sum_{\mu \neq 1, \nu} \xi_i^1(\omega)\xi_i^\mu(\omega)m_\mu(\omega)$  which are both of order  $O(1)$ , and we employ the Taylor expansion of  $h$  near the origin  $x = 0$ :

$$\begin{aligned} h(m_\nu(\omega)) &= \frac{1}{N} \sum_{i=1}^N \xi_i^\nu(\omega)\xi_i^1(\omega) \tanh \beta(d_1 m_1(\omega) + \sum_{\mu \neq 1, \nu} \xi_i^\mu(\omega)\xi_i^1(\omega)m_\mu(\omega)) \\ &+ \frac{\beta}{N} \left( \sum_{i=1}^N (1 - \tanh^2(\beta(d_1 m_1(\omega) + \sum_{\mu \neq 1, \nu} \xi_i^\mu(\omega)\xi_i^1(\omega)m_\mu(\omega)))) \right) m_\nu(\omega) + c(m_\nu(\omega))^2 \end{aligned} \quad (16)$$

where  $|c| \leq \beta^2$ , which is obtained by using the Lagrange form of remainder  $c(m_\nu(\omega))^2$  to estimate the second derivative  $h''(0)$  and by noting that  $|\tanh(x)| \leq 1$  for all  $x \in \mathbb{R}$ . Thus, the Taylor series remainder is of order  $O(1/N)$ , which we ignore compared to the standard deviation of  $m_\nu$  namely  $\sqrt{r}/\sqrt{N}$ . By Lemma 4.1, the last summation in Equation (16), containing the bounded continuous function  $\tanh^2$ , converges almost surely to  $q$  as  $N \rightarrow \infty$ . Moreover, by using  $t = 3/2$  in the second part of Lemma 4.1, it follows that for large  $N$ , while retaining  $m_\nu$  which is of order  $1/\sqrt{N}$ , we can replace the sum in the equation with  $q$  by ignoring the error which, for any degree of certainty, is of order  $o(1/\sqrt{N})$ . Thus, by using  $m_\nu(\omega) = h(m_\nu(\omega))$  from Equation (4), we now obtain the following reduced stochastic equation for  $\nu \neq 1$ :

$$(1 - \beta(1 - q))m_\nu(\omega) = \frac{1}{N} \sum_{i=1}^N \xi_i^\nu(\omega)\xi_i^1(\omega) \tanh \beta \left( d_1 m_1(\omega) + \sum_{\mu \neq 1, \nu} \xi_i^\mu(\omega)\xi_i^1(\omega)m_\mu(\omega) \right) \quad (17)$$

Now we drop  $\omega$  everywhere and let the right hand side of Equation (17) be written as  $Z_N = \sum_{i=1}^N Z_{Ni}$  with  $Z_{Ni} = \frac{1}{N} \xi_i^\nu \xi_i^1 \tanh \beta(X'_i)$ , where  $X'_i = d_1 m_1 + \sum_{\mu \neq 1, \nu} \xi_i^\mu \xi_i^1 m_\mu$ . By Lemma 4.3 and Equation (9),  $X'_i \sim X_i \sim \mathcal{N}(d_1 m, r\alpha)$  and the three random variables  $\xi_i^\nu$ ,  $\xi_i^1$  and  $X'_i$  are independent.

We again have an array  $Z_{Ni}$  of random variables  $1 \leq i \leq N$  for each  $N$ , and by the independence of the above three random variables we have:  $E(Z_{Ni}) = 0$  and

$$\begin{aligned} E(Z_{Ni}^2) &= \frac{1}{N^2} E(\xi_i^\nu)^2 E(\xi_i^1)^2 E(\tanh^2 \beta(X'_i)) \\ &= \frac{1}{N^2} E(\tanh^2 \beta(X_i)) = E(Y_{Ni}^2) = \frac{q}{N^2}, \end{aligned} \quad (18)$$

as in Equation (13). Therefore,  $\sigma_N^2 = \sum_{i=1}^N E(Z_{Ni}^2) = q/N$ . Moreover, it is easy to see that  $E(|Z_{Ni}|^3) \leq 1/N^3$  since  $|\tanh(x)|$  is bounded by 1 for all  $x \in \mathbb{R}$ . Thus,

$$\frac{1}{\sigma_N^3} \sum_{i=1}^N E(|Z_{Ni}|^3) = O(1/N^{1/2}) \quad (19)$$

and it follows that the Lyapunov condition holds for  $\delta = 1$ . We conclude by Lyapunov's theorem that  $Z_N/\sigma_N \sim \mathcal{N}(0, 1)$  and thus  $Z_N \sim \mathcal{N}(0, q/N)$ . From this and Equation (17), we deduce that

$$m_\nu \sim \mathcal{N} \left( 0, \frac{q}{(1 - \beta(1 - q))^2 N} \right) \quad (20)$$

and obtain  $r = q/(1 - \beta(1 - q))^2$  in Equation (5(iv)). This completes the proof of the theorem.  $\square$

## References

- [1] L. E. Baum and M. Katz. Convergence rates in the law of large numbers. *Transactions of the American Mathematical Society*, 120(1):108–123, 1965.
- [2] P. Billingsley. *Probability and Measure*. John Wiley & Sons, second edition edition, 1986.
